# Supplementary material
Source: Research Square preprint supplement (doi:10.21203/rs.3.rs-9524489/v1)
Supplement: Supplementary file 1 [file 8d256a4c04945bcff4bea214.docx]

**Supplementary Material (Appendices)**

*The Green-Digital Paradox: An Institutional and Resource-Based Inquiry into the Contested Sustainability of Corporate Digital Transformation*

# Appendix A. Interview Protocol

**Interviewee role (target):** C-suite executive (e.g., CSO, CIO, CTO, Head of Strategy). **Estimated duration:** 60–90 minutes.

**A note on ethics and consent.** The protocol was reviewed and approved by the institutional research ethics committee (see the Declarations section of the main manuscript). Participation was voluntary, all data were handled confidentially and anonymized, and informed consent — including consent to audio-record and to the later use of anonymized quotations — was obtained before each interview.

**Part 1. Introduction and consent (5 min)**

- Introduction of the researcher and the purpose of the study.
- Explanation of confidentiality, anonymity, and the participant’s right to withdraw at any time.
- Request for permission to audio-record the interview.
- “Do you have any questions before we begin? Are you happy to proceed?”

**Part 2. Grand-tour questions: setting the strategic context (15–20 min)**

- “To start, could you give me a broad overview of your company’s approach to corporate sustainability? What are the main drivers behind your sustainability strategy?”
  - *Probes:* What are your key sustainability priorities (e.g., carbon reduction, circular economy, water use)? How are these goals set and measured?
- “Similarly, could you describe your company’s digital transformation journey? Which technologies are you investing in, and what strategic goals are they meant to achieve?”
  - *Probes:* What are the primary business drivers for these digital investments (e.g., efficiency, innovation)? Who champions these initiatives?
- “From your perspective, how do these two strategies — sustainability and digitalization — intersect in your organization? Are they viewed as separate, synergistic, or something else?”

**Part 3. Probing the paradox: tensions and trade-offs (25–30 min)**

- “Many people see digital technology as a key enabler for sustainability. Can you share examples where digital tools have clearly helped you advance your environmental goals?”
- “Now the other side of the coin. Have you encountered situations where a major digital initiative created new or unexpected environmental challenges — for instance, the energy use of data centres or AI, e-waste from hardware upgrades, or resource use in manufacturing new digital products?”
- “When a major investment decision has both digital and environmental implications, how are the trade-offs between digital performance and environmental impact evaluated?”
  - *Probes:* Is there a formal process? Are metrics such as ‘carbon footprint per computation’ considered? How are conflicting priorities between, say, IT and sustainability resolved?

**Part 4. Exploring Paradox Management Capability (15–20 min)**

- “Thinking about the challenges we’ve discussed, what organizational structures or processes has your company put in place to manage the relationship between your digital and sustainability agendas?”
- **[Enhanced probe]** “Can you recall an instance where an attempt to integrate these agendas failed, or created more problems? What did you learn from it?”
  - *Probes:* Are there cross-functional teams? Joint governance committees? Integrated reporting frameworks?
- “From a leadership perspective, what mindset is needed to navigate these tensions? Is it about finding a perfect ‘win-win,’ or about managing a permanent state of compromise?”
- “Which capabilities or resources are most critical to getting this right? If you were advising another company, what would you tell them they need to develop to avoid the pitfalls of the Green-Digital Paradox?”

**Part 5. Conclusion and wrap-up (5 min)**

- Final questions, and a reiteration of thanks and of the confidentiality assurances.

# Appendix B. Survey Measurement Items

All items except Sustainability/Performance items were measured on a seven-point Likert scale (1 = strongly disagree, 7 = strongly agree). The performance items were measured on a seven-point scale relative to competitors (1 = much worse, 4 = about the same, 7 = much better).

| **Construct** | **Code** | **Item text** | **Source** |
| --- | --- | --- | --- |
| Institutional Pressure (Sustainability) | IPS1 | Our key customers demand that we demonstrate strong environmental performance. | Adapted from Delmas & Toffel (2008) |
|  | IPS2 | Government regulations on environmental impact are a significant factor in our strategic planning. |  |
|  | IPS3 | There is strong pressure from our investors (e.g., ESG funds) to improve our sustainability ratings. |  |
|  | IPS4 | Our most significant competitors are actively promoting their own sustainability initiatives. |  |
| Institutional Pressure (Digitalization) | IPD1 | Our key customers expect us to offer digitally enabled products and services. | Adapted from Teo, Wei, & Benbasat (2003) |
|  | IPD2 | Government initiatives promoting digital transformation are relevant to our business strategy. |  |
|  | IPD3 | There is strong pressure from our investors to invest in cutting-edge technologies such as AI and big data. |  |
|  | IPD4 | Our most significant competitors are making substantial investments in digital transformation. |  |
| Green Capabilities | GC1 | Our firm has well-developed processes for minimizing waste and preventing pollution. | Adapted from Chen, Lai, & Wen (2006) |
|  | GC2 | We have strong capabilities in designing products with their full life-cycle in mind (circular design). |  |
|  | GC3 | Our firm is highly effective at managing its environmental impact across the supply chain. |  |
|  | GC4 | Our firm excels at conserving natural resources and energy in its operations. |  |
| Digital Capabilities | DC1 | Our firm has a sophisticated IT infrastructure that supports advanced analytics. | Adapted from Mithas, Ramasubbu, & Sambamurthy (2011) |
|  | DC2 | We have strong capabilities in collecting, processing and analysing large volumes of data (big data). |  |
|  | DC3 | Our firm is highly effective at integrating artificial intelligence (AI) into core processes. |  |
|  | DC4 | Our firm excels at using digital technology to innovate our products, services and business models. |  |
| Paradox Management Capability | PMC1 | Our firm has formal processes to evaluate both the digital benefits and the environmental footprint of new technology investments. | Newly developed for this study; items derived from the Phase A interviews and validated via CFA and reliability tests (see Section 3) |
|  | PMC2 | Our leadership team actively encourages open and honest discussion about the trade-offs between digitalization and sustainability. |  |
|  | PMC3 | There is strong and effective cross-functional collaboration between our IT/technology teams and our sustainability/CSR teams. |  |
|  | PMC4 | When making strategic decisions, we explicitly seek solutions that optimize for both digital innovation and environmental performance, rather than maximizing one at the expense of the other. |  |
| Environmental & Economic Performance (final dependent variable) | SP1 | Compared with our main competitors over the last three years, our overall financial performance (e.g., profitability, return on investment) has been… (economic dimension). | Adapted from Ketokivi & Schroeder (2004), building on Venkatraman & Ramanujam (1986) |
|  | SP2 | …our performance in reducing our negative environmental impact (e.g., carbon emissions, waste, resource use) has been… (environmental dimension). |  |

*Note.* Item-purification note: a social-performance item and an eco-innovation item were piloted during Phase A but removed during scale purification, yielding the final two-item Environmental and Economic Performance construct used in all reported analyses (see Table 2 of the main manuscript). The social dimension is identified in Section 6 as the principal direction for future research (the Green-Social-Digital Trilemma).
